# Supplementary material
Source: Springer Nature journal article supplement (https://www.springermedizin.de/resource/supplementary/12985_2010_982_MOESM1_ESM.pdf/9608878)

**A**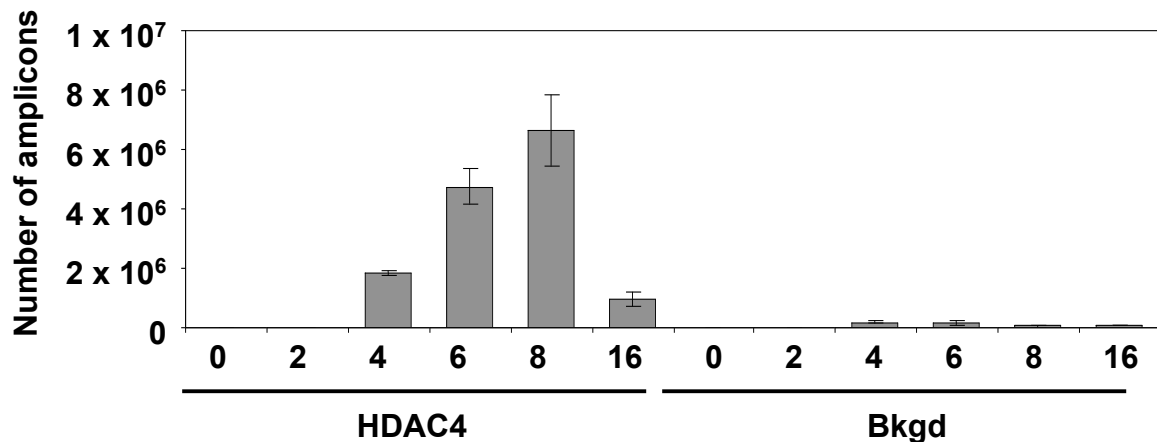**B**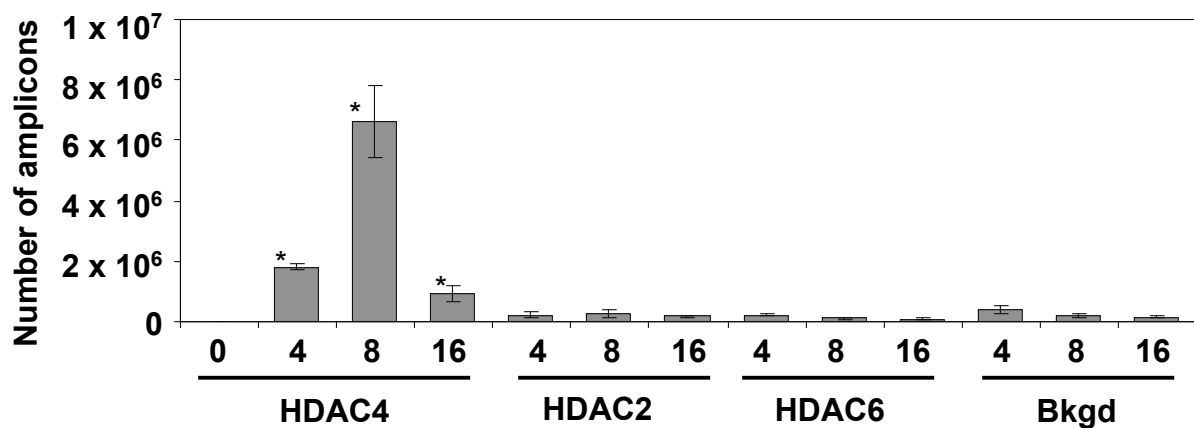**C**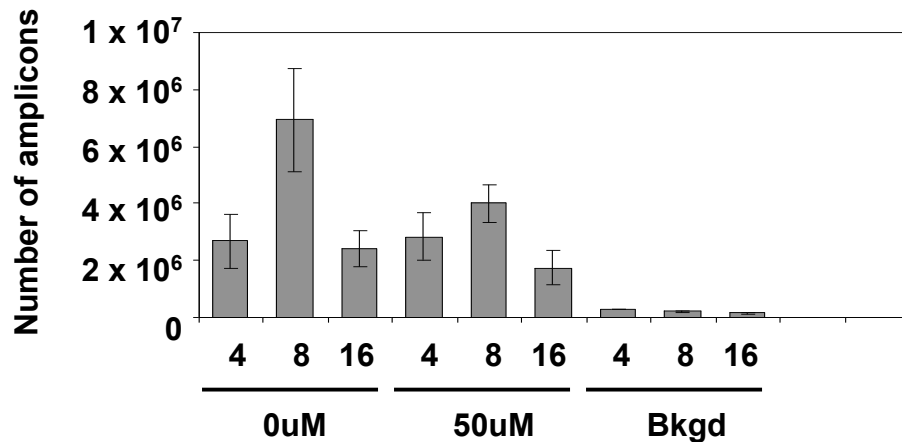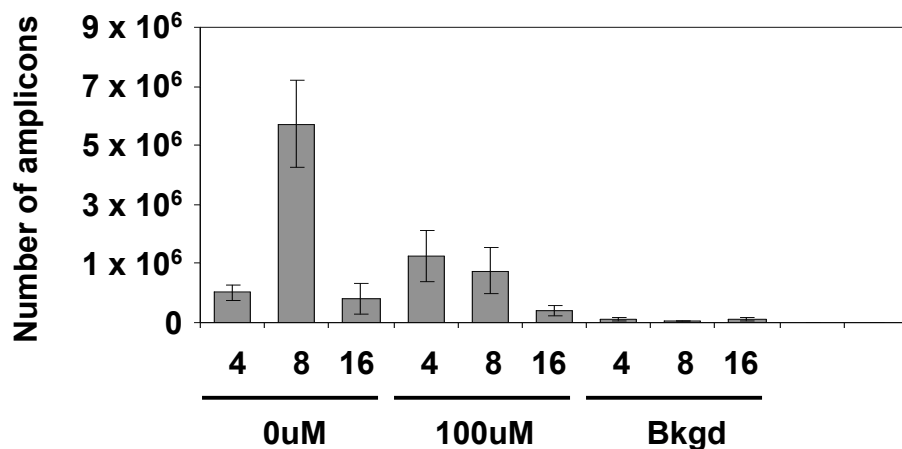

Supplement: MOESM1 [file 9608878]
